# Supplementary material for: Reprocessable and recyclable styrene-based resins with low dielectric and good mechanical properties
Source: Royal Society of Chemistry journal article supplement (doi:10.1039/c8ra07817c), 2018-01-01
Supplement: c8ra07817c1.pdf [file c8ra07817c1.pdf]

## Reprocessable and recyclable styrene-based resins with low dielectric and good mechanical property

Yang Xiong,<sup>a,b</sup> Lili Liu,<sup>b</sup> Chengyao Hu,<sup>b</sup> Yawen Huang,<sup>a\*</sup> Xiuli Zhao,<sup>c</sup> Junxiao Yang<sup>a</sup>

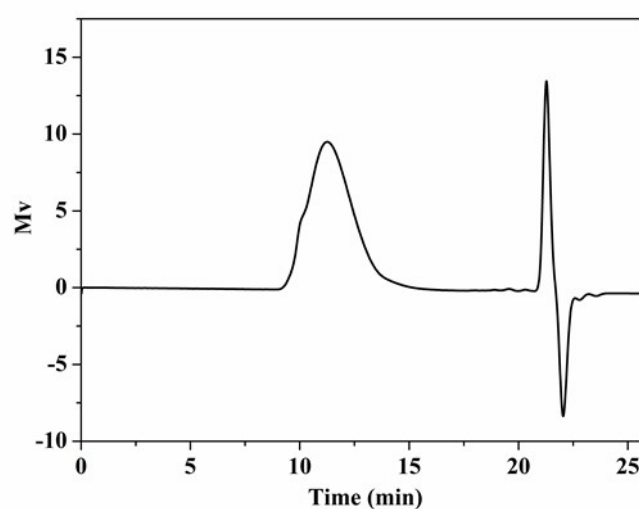

Figure S1. GPC spectrum of PSVP.

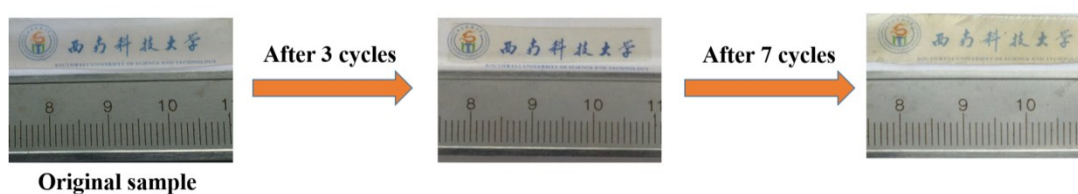

Figure S2. The photo pictures of original PSVP-Zn strips and that after 3 and 7 cycles.
